# Supplementary material for: Synthesis of magnetic silica-based nanocomposites containing Fe3O4nanoparticles
Source: Royal Society of Chemistry journal article supplement (doi:10.1039/b409449b), 2004-01-01
Supplement: b409449b-4s.doc [file b409449b-4s.doc]

# Supplementary Material (ESI) for Journal of Materials Chemistry

# This journal is © The Royal Society of Chemistry 2004

# SUPPLEMENTARY MATERIAL

**Synthesis of Magnetic Silica-Based Nanocomposites Containing Fe3O4 Nanoparticles.**

*By Victor Matsura,a Yannick Guari,a* Joulia Larionova,a* Christian Guérin,a Andrea Caneschi,b Claudio Sangregorio,b Emmanuelle Lancelle-Beltran,a Ahmad Mehdi,a Robert J. P. Corriua*

aLaboratoire de Chimie Moléculaire et Organisation du Solide (LCMOS), UMR 5637, Université Montpellier II, Place E. Bataillon, 34095 Montpellier cedex 5, France. Fax: (33) 4 67 14 38 52, e-mail: [joulia@univ-montp2.fr](mailto:joulia@univ-montp2.fr); [guari@univ-montp2.fr](mailto:guari@univ-montp2.fr)

bINSTM Research Unit-Dipartimento di Chimica, Università di Firenze, via della Lastruccia 3, 50019 Sesto F.no, Firenze, Italy.

a)

b)


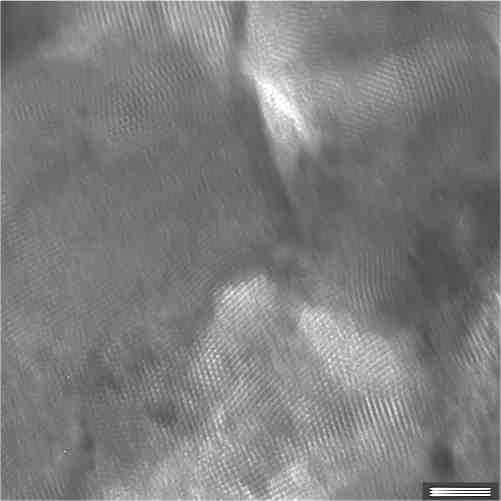


**Figure 4S**. Transmission electron microscopy (TEM) image for the composite material **2**. Scale bar = 100 nm.
